# Supplementary material
Source: Research Square preprint supplement (doi:10.21203/rs.3.rs-10141667/v1)
Supplement: Supplementary file 1 [file 1c44140ed2f329ff34e314f8.docx]

**HIGHLIGHTS**

- Investigation of various size of TiO₂ nanoparticles infusing in diesel + WTPO blend
- Thermodynamic, environmental, and economic analysis of diesel engine running on TiO₂ nanofluids
- TiO2 nanofluids of usage resulted in a reduction of the exergo-environmental and economic factors
- Nano-sized additives could ensure a remarkable improvement in view of engine outputs
- Choosing nanoparticles is only possible if their prices are lowered
